# Supplementary material for: Effect of Dietary Chestnut or Quebracho Tannin Supplementation on Microbial Community and Fatty Acid Profile in the Rumen of Dairy Ewes
Source: PubMed Central journal article supplement (PMC5804114; doi:10.1155/2017/4969076), 2017-12-31
Supplement: 4969076.f1.pdf [file 4969076.f1.pdf]

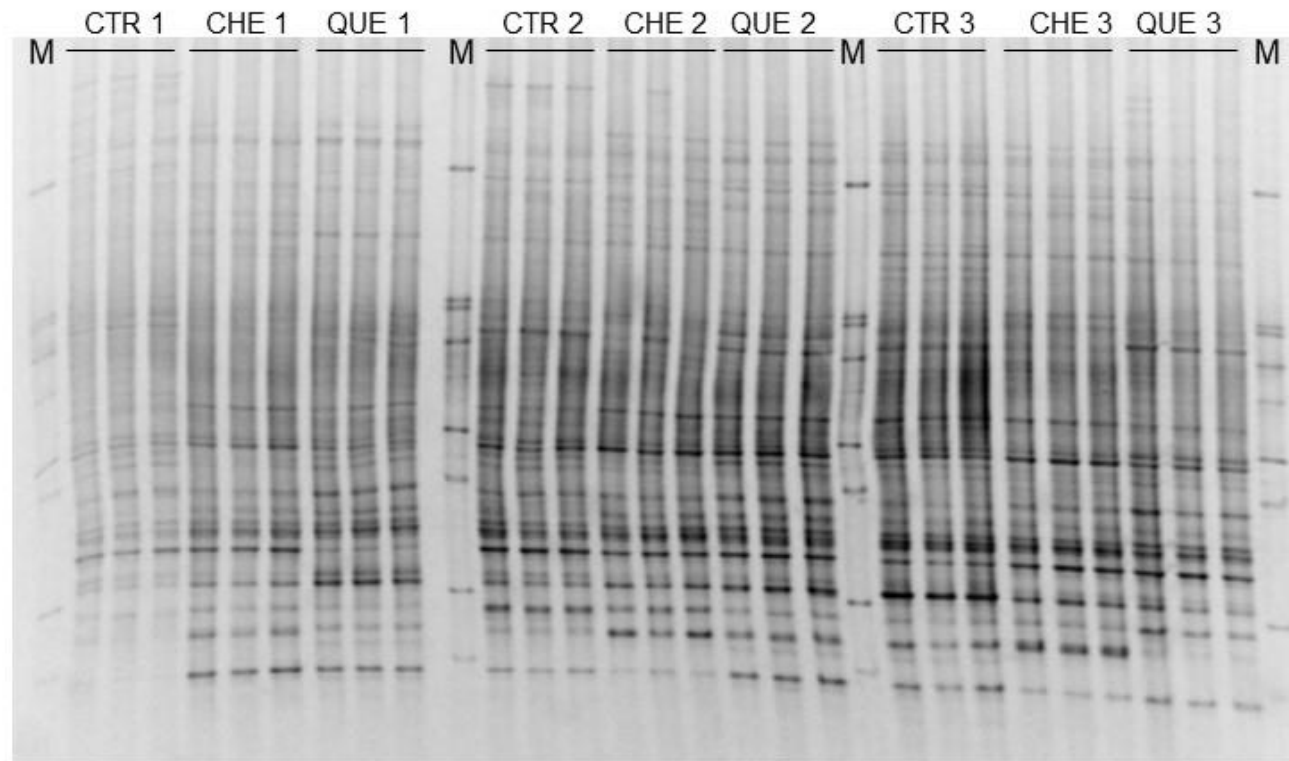

**Supplementary material 1.** DGGE profiles of 16S rDNA PCR products obtained from DNA extracted from rumen liquor using primer for the total bacteria (F968GC-1401R). CTR, control diet (84 g kg<sup>-1</sup> DM of soybean oil); CHE, chestnut tannins diet (84 g kg<sup>-1</sup> DM of soybean oil plus 52.8 g kg<sup>-1</sup> DM of a chestnut tannin extract); QUE, quebracho tannins diet (84 g kg<sup>-1</sup> DM of soybean oil plus 52.8 g kg<sup>-1</sup> DM of a quebracho tannin extract); M, marker used for normalization of bands.

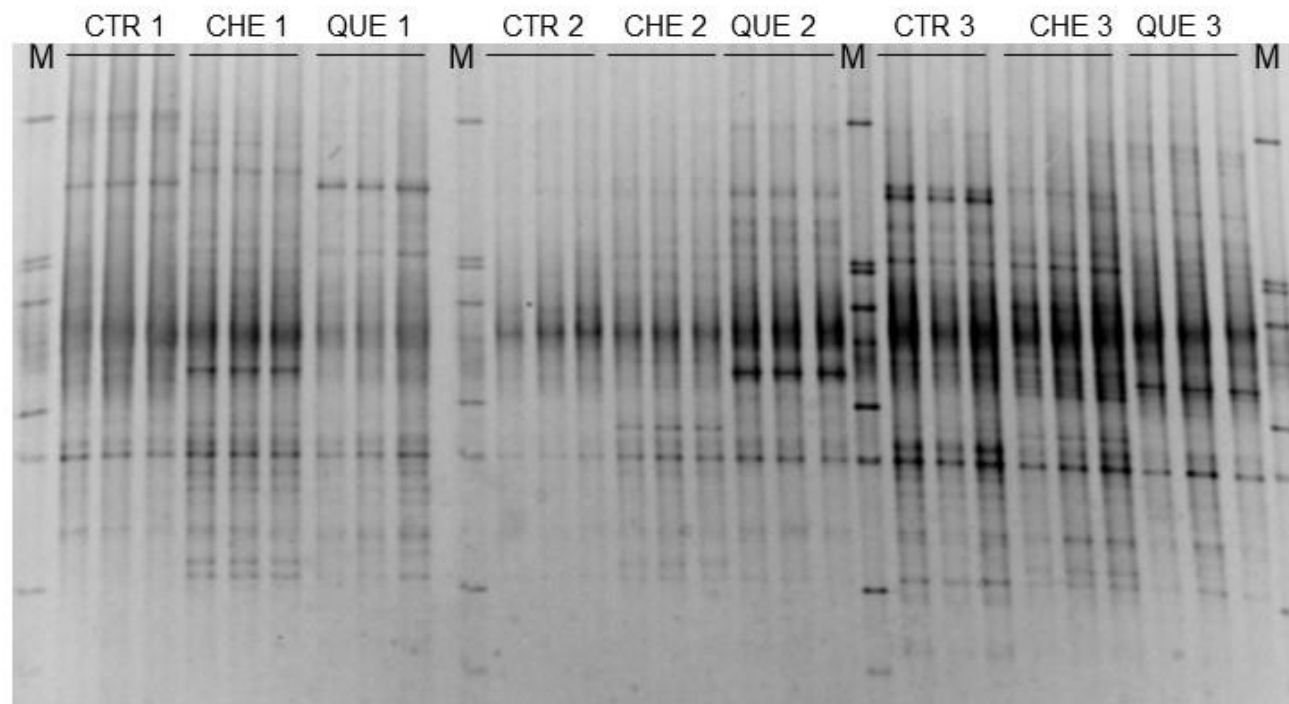

**Supplementary material 2.** DGGE profiles of 16S rDNA PCR products obtained from DNA extracted from rumen liquor using primer for the *Butyrivibrio* group (F968GC-B fib). CTR, control diet (84 g kg<sup>-1</sup> DM of soybean oil); CHE, chestnut tannins diet (84 g kg<sup>-1</sup> DM of soybean oil plus 52.8 g kg<sup>-1</sup> DM of a chestnut tannin extract); QUE, quebracho tannins diet (84 g kg<sup>-1</sup> DM of soybean oil plus 52.8 g kg<sup>-1</sup> DM of a quebracho tannin extract); M, marker used for normalization of bands.
